# Supplementary material for: Retention in HIV care and associated factors among youths aged 15–24 years in rural southwestern Uganda
Source: Springer Nature journal article supplement (doi:10.1186/s12889-021-11547-5), 2021-07-31
Supplement: MOESM1 [file 19408542]

***QUESTIONNAIRE - ENGLISH VERSION***

| <b>Questions</b>                         | <b>Response</b> |
|------------------------------------------|-----------------|
| How old are you (in complete years)?     |                 |
| What is your biological sex?             | Male            |
|                                          | Female          |
| What is your current marital status?     | Unmarried       |
|                                          | Married         |
| What is your highest level of Education? | None            |
|                                          | Primary         |
|                                          | Secondary       |
|                                          | Tertiary        |
| What is your subcounty of origin?        | Kabuyanda SC    |
|                                          | Kabuyanda TC    |
|                                          | Kikagati SC     |
|                                          | Other           |
| Have you ever disclosed your HIV status? | Yes             |

|                                                                           |                                |
|---------------------------------------------------------------------------|--------------------------------|
|                                                                           | No                             |
| Did you acquire HIV perinatally?                                          | Yes                            |
|                                                                           | No                             |
| Retention in HIV care : the total number of clinic visits in each quarter | 1 <sup>st</sup> quarter: _____ |
|                                                                           | 2 <sup>nd</sup> quarter: _____ |
|                                                                           | 3 <sup>rd</sup> quarter: _____ |
|                                                                           | 4 <sup>th</sup> quarter: _____ |
